# Supplementary material for: Most partial domains in proteins are alignment and annotation artifacts
Source: PubMed Central journal article supplement (PMC4443539; doi:10.1186/s13059-015-0656-7), 2015-05-15

PF00079 (372 aa)

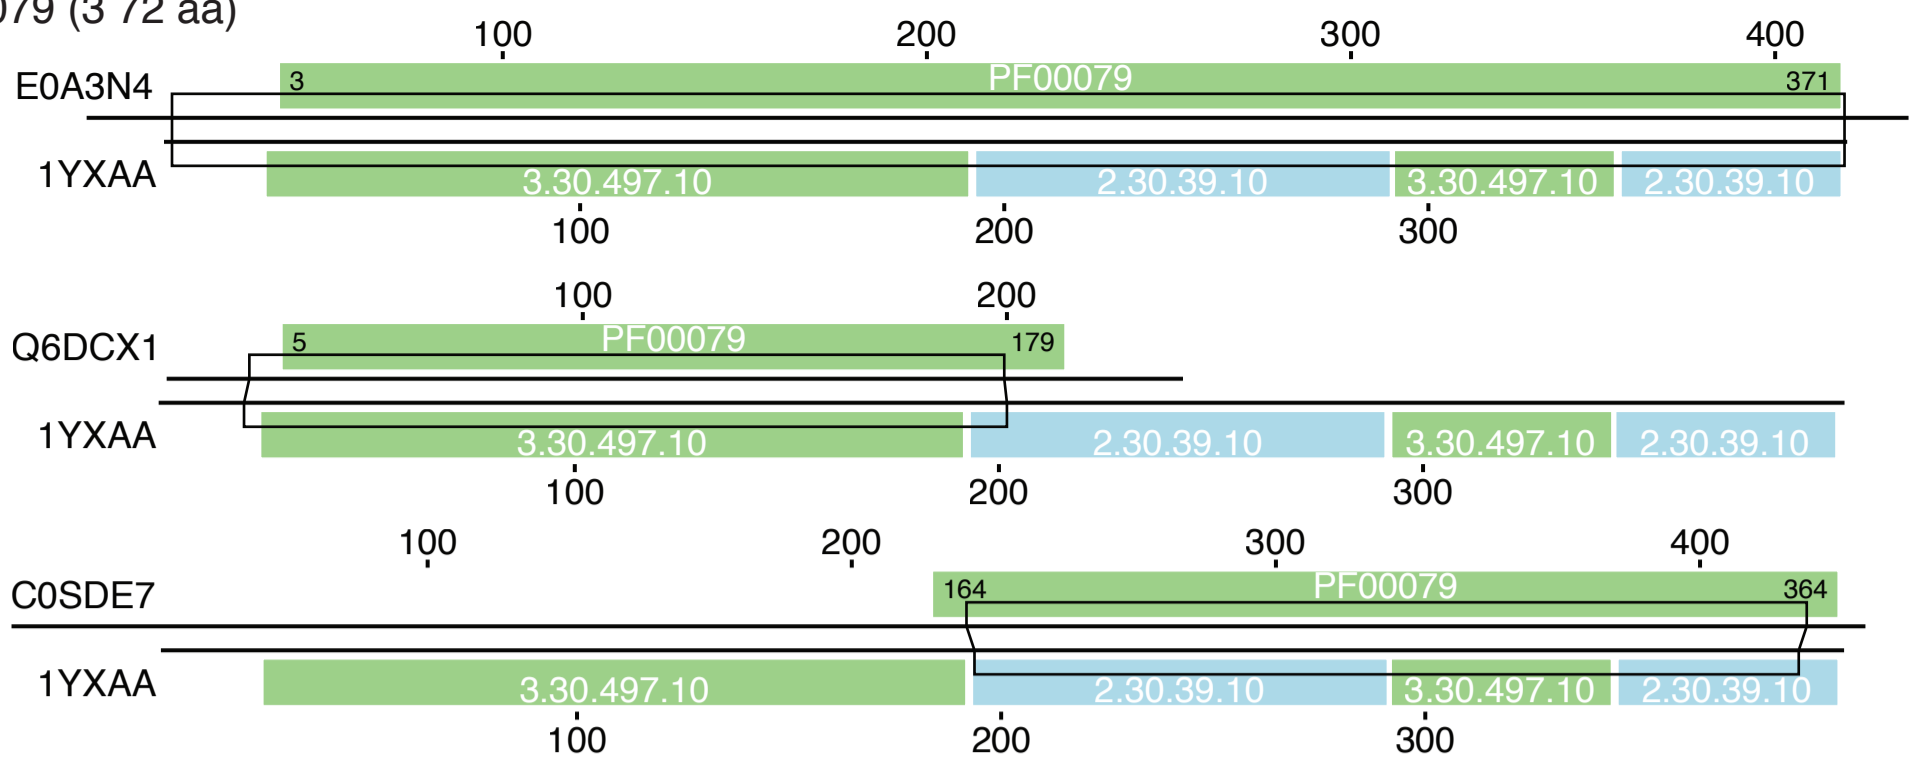

PF00118 (488 aa)

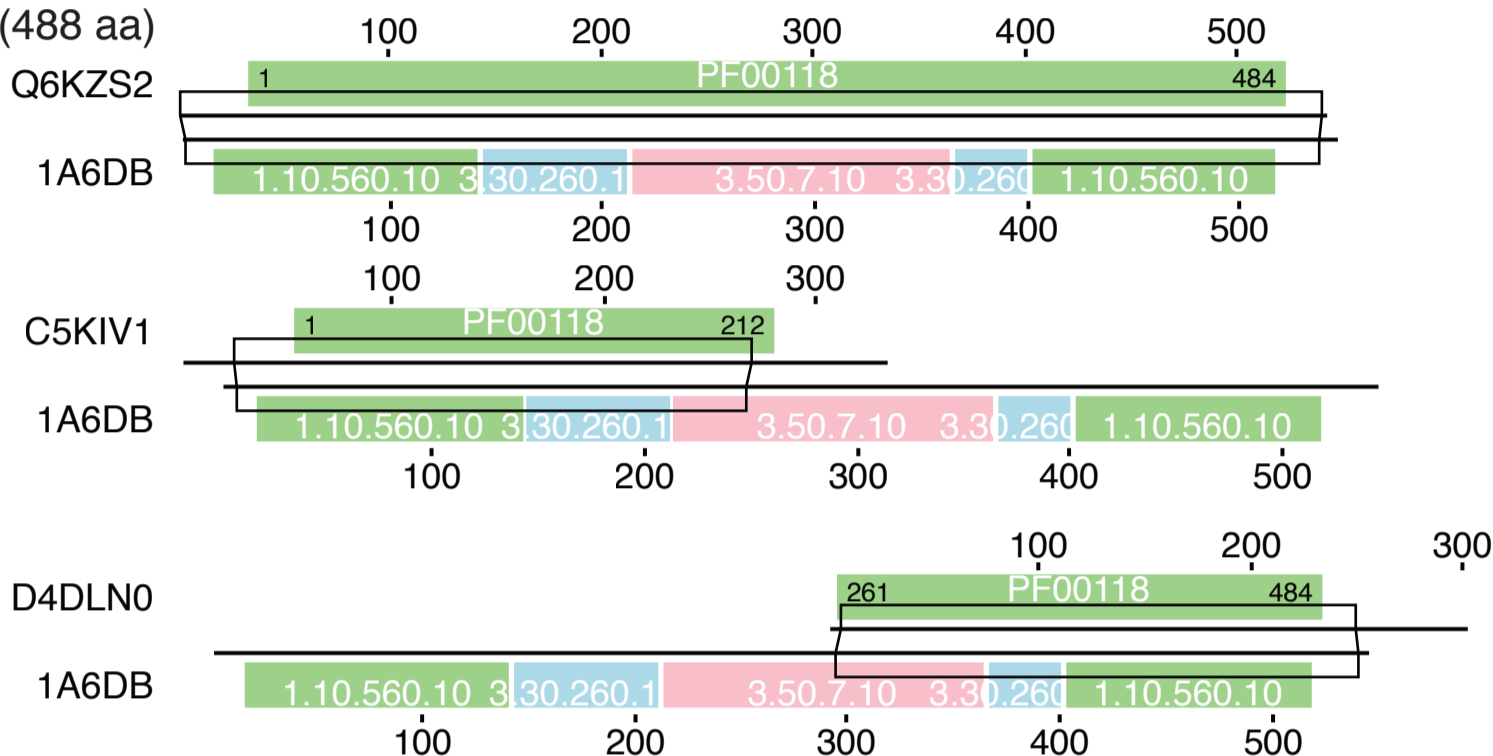

PF00285 (356 aa)

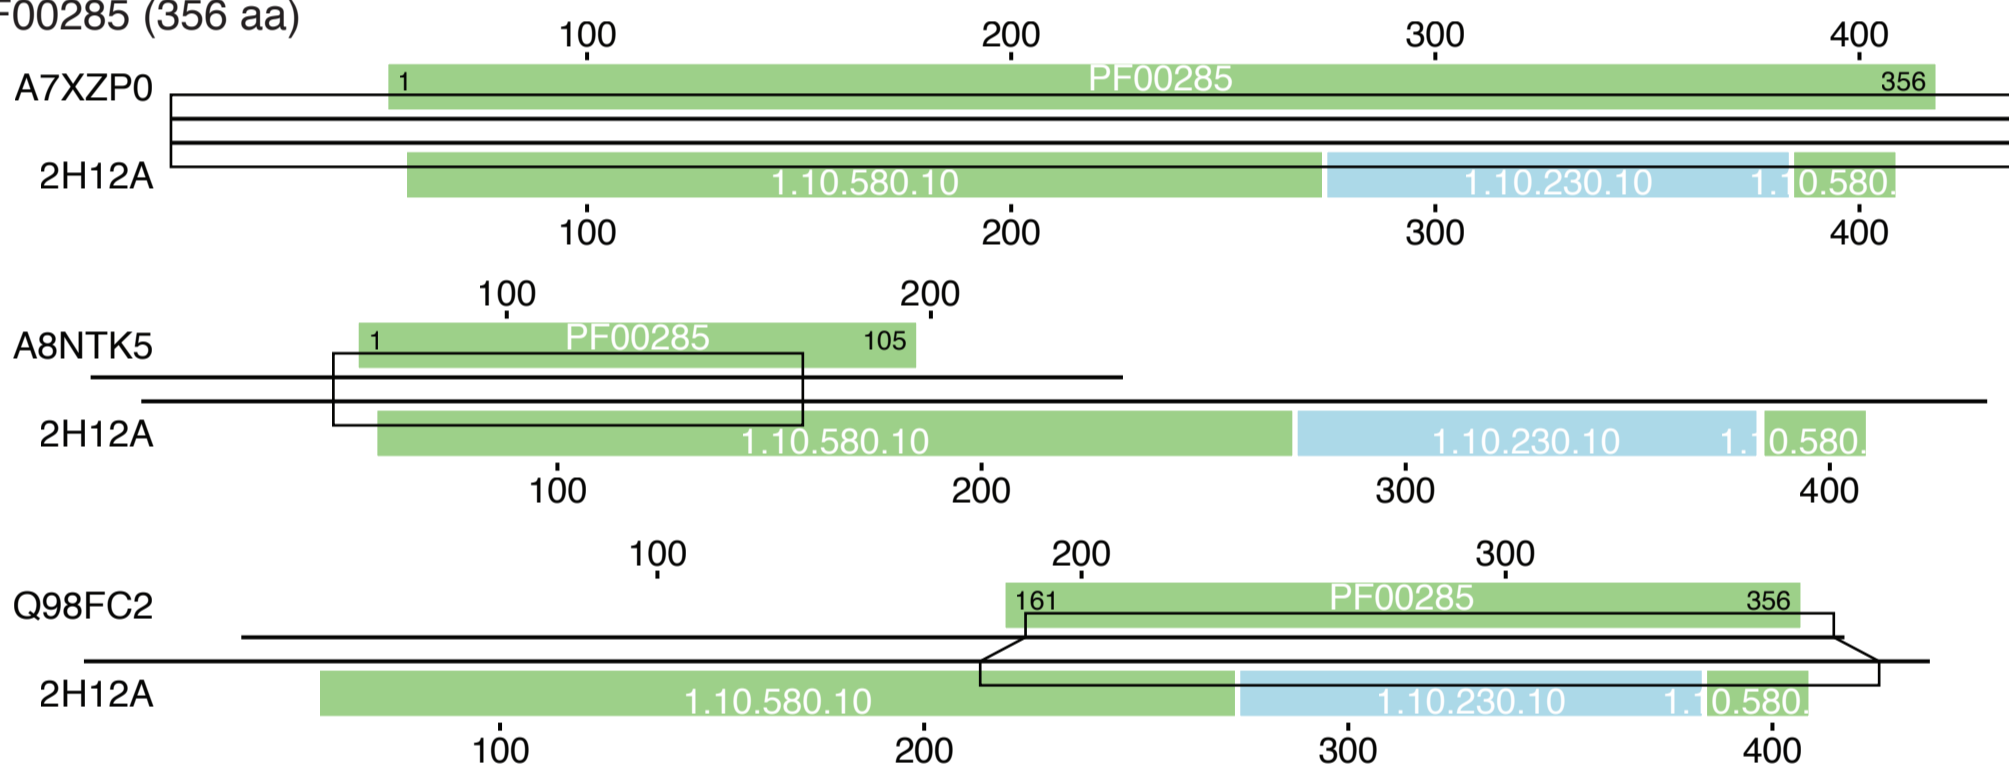

PF00316 (325 aa)

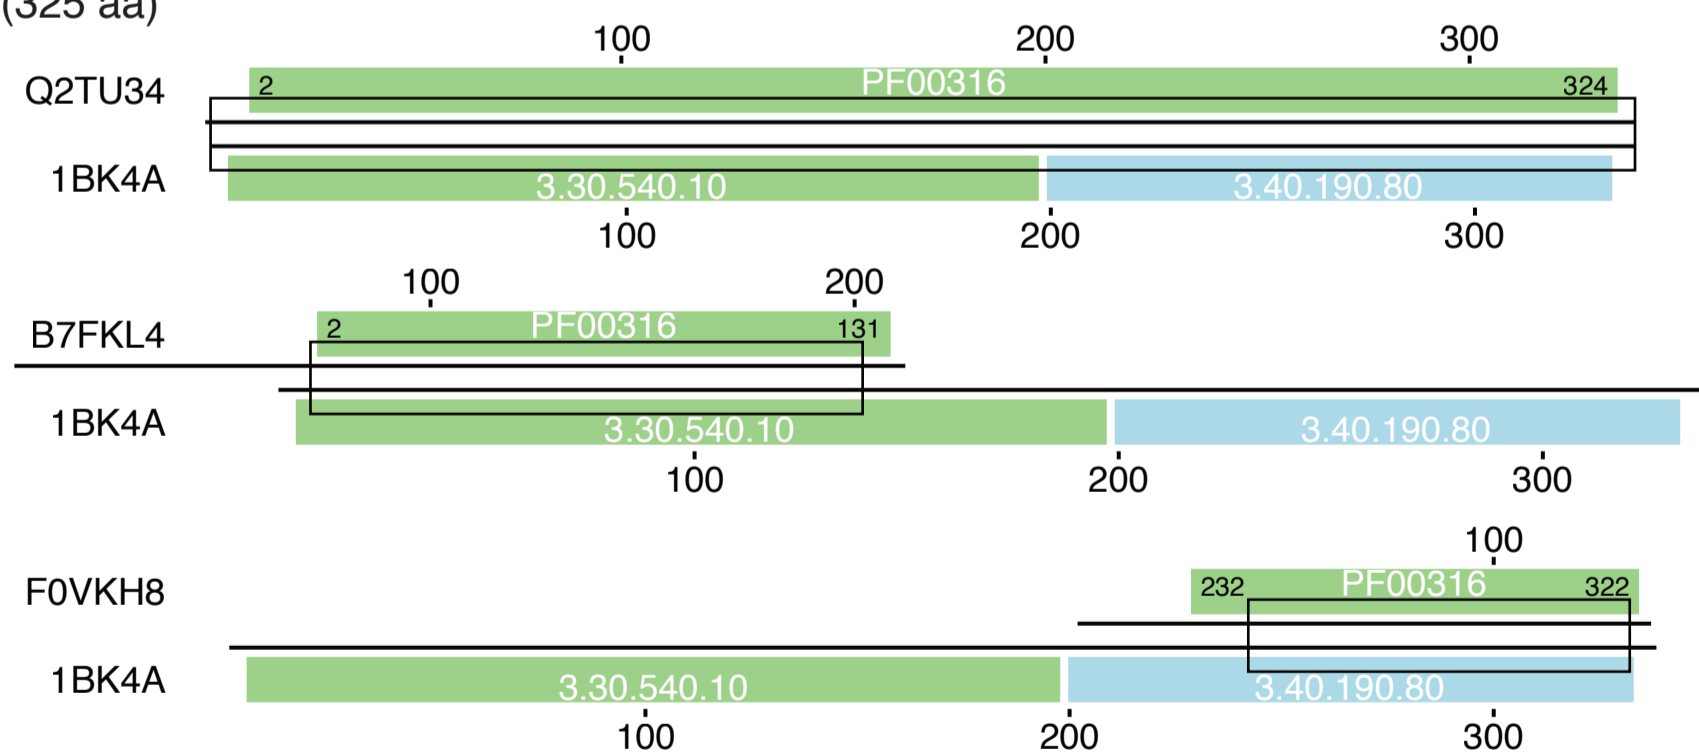

PF00476 (383 aa)

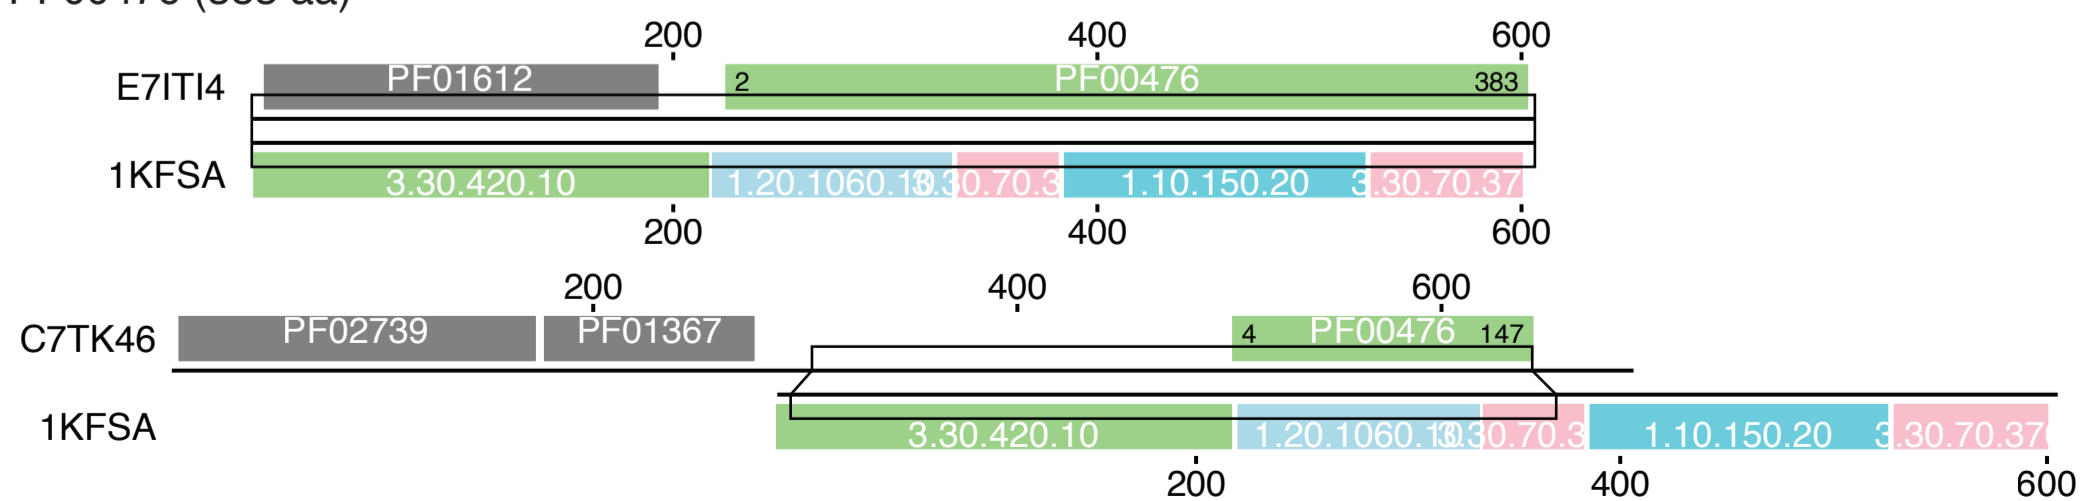

Supplement: 13059_2015_656_MOESM2_ESM.pdf [file 13059_2015_656_MOESM2_ESM.pdf]
