# Supplementary material for: Most partial domains in proteins are alignment and annotation artifacts
Source: PubMed Central journal article supplement (PMC4443539; doi:10.1186/s13059-015-0656-7), 2015-05-15

PF00710 (313 aa)

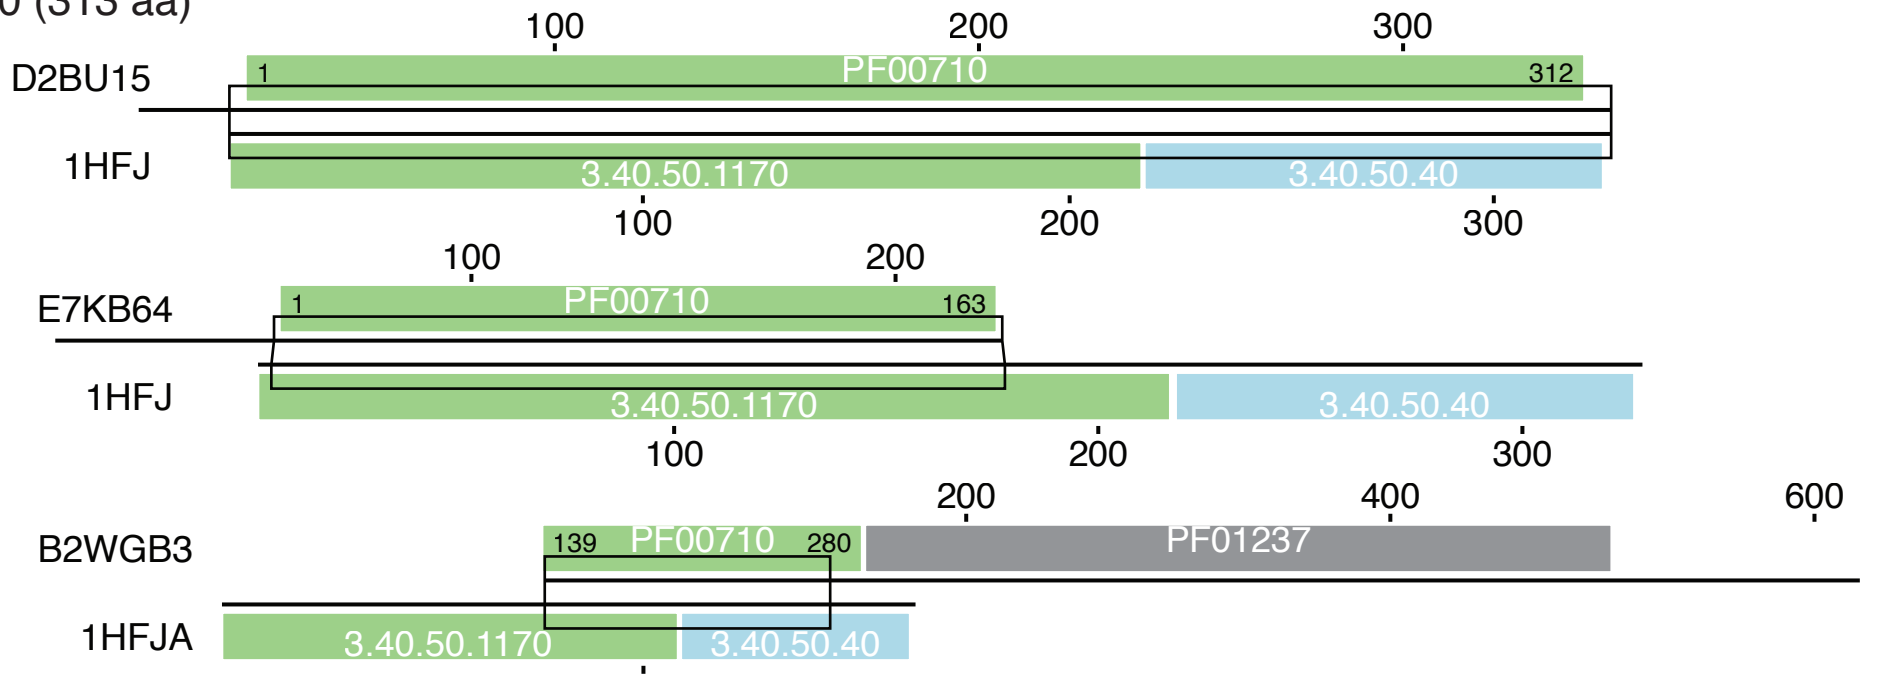

PF01544 (292 aa)

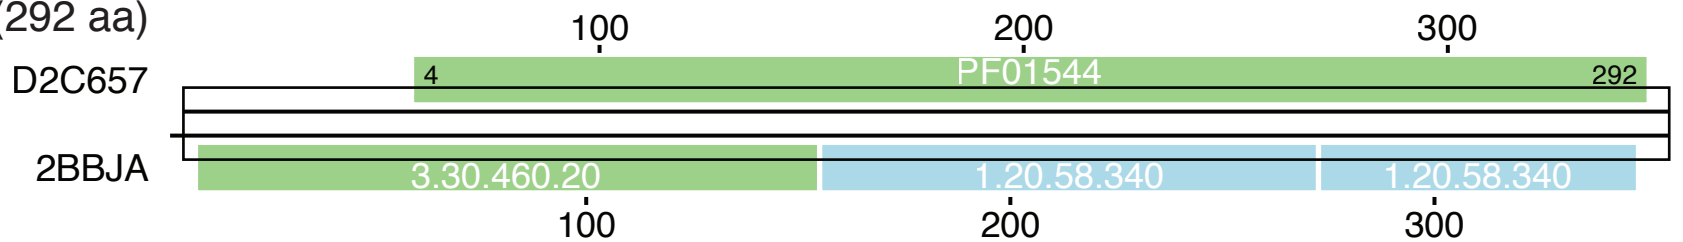

PF01571 (211 aa)

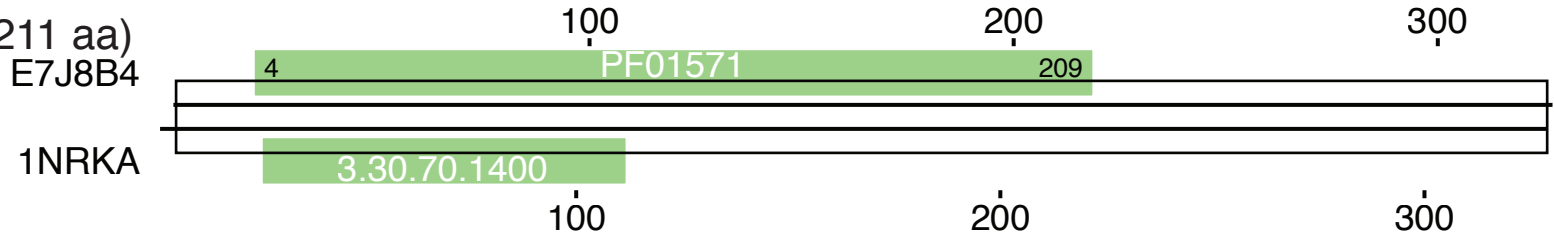

PF03441 (277 aa)

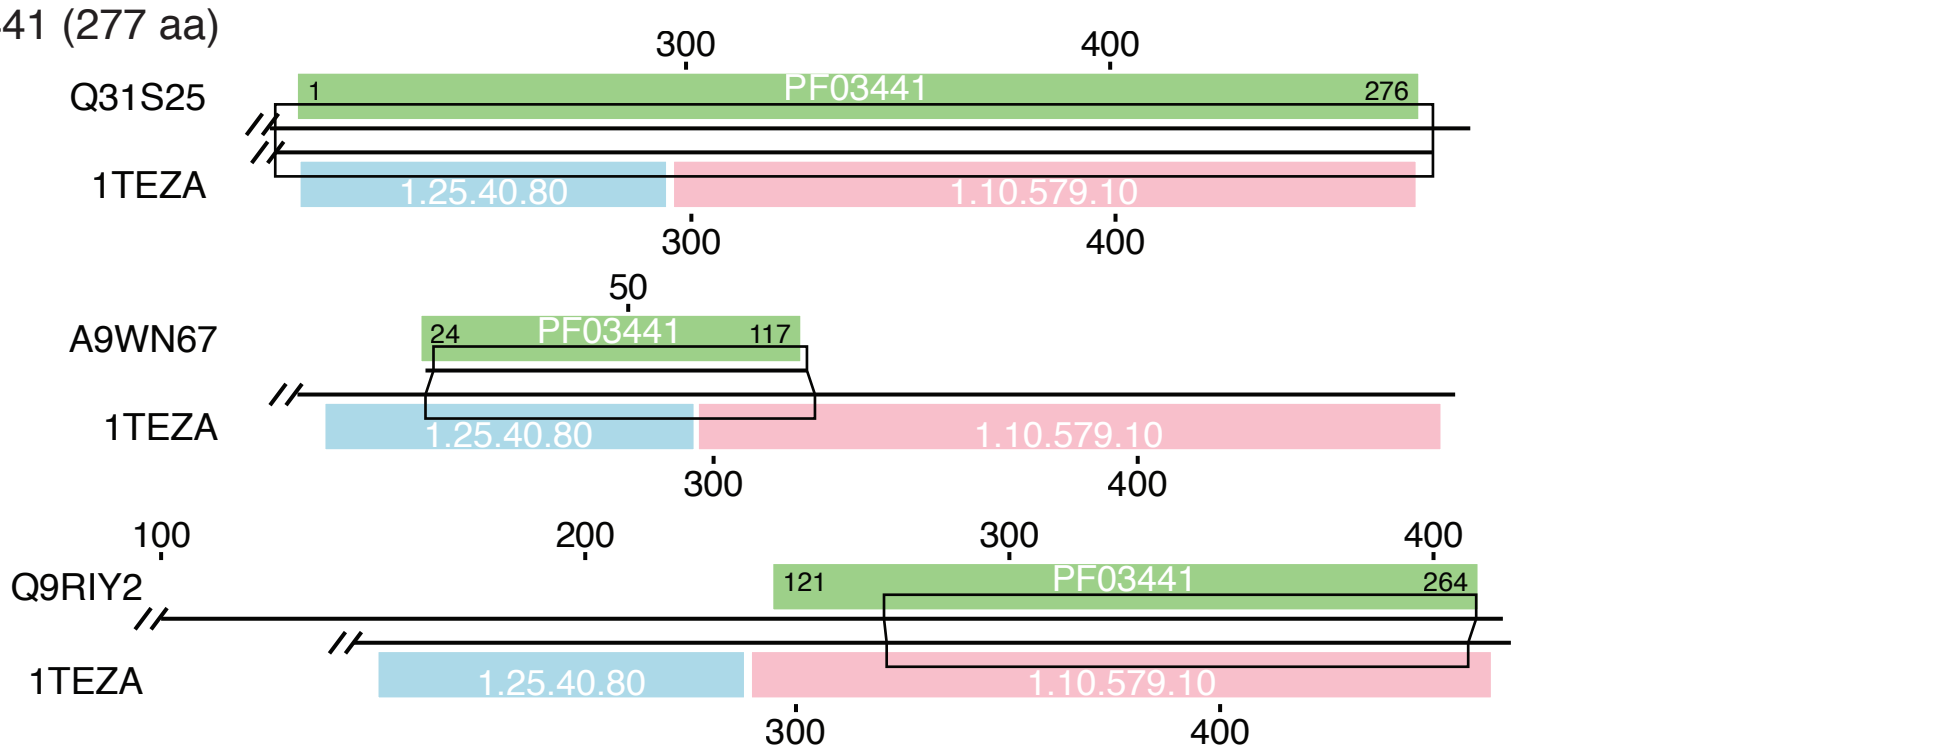

PF03598 (277 aa)

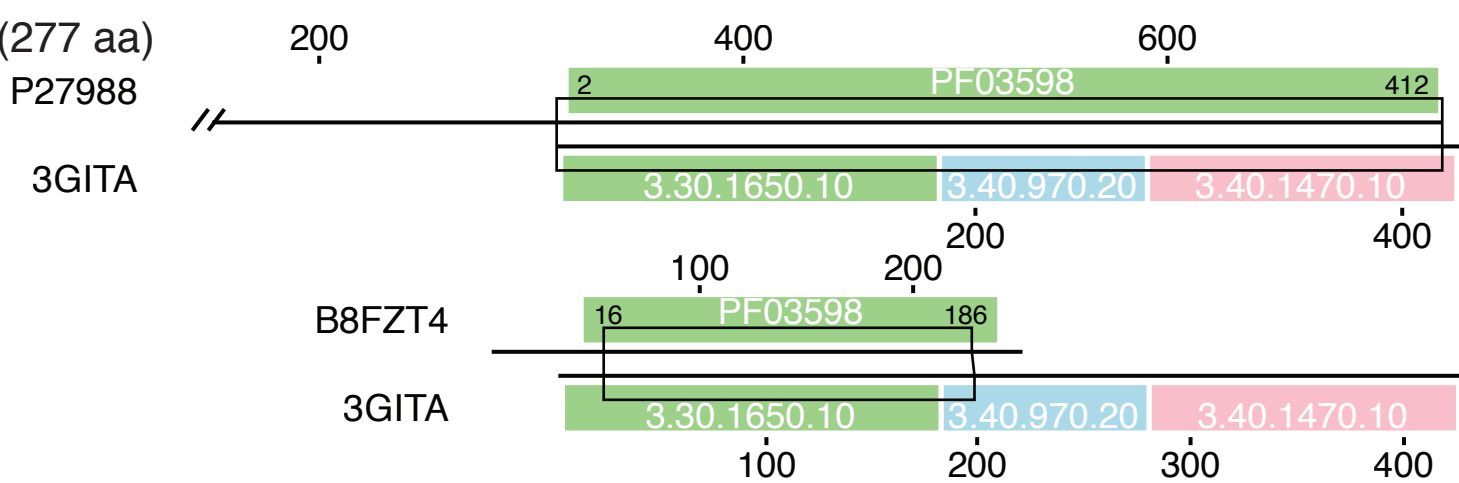

PF03917 (370 aa)

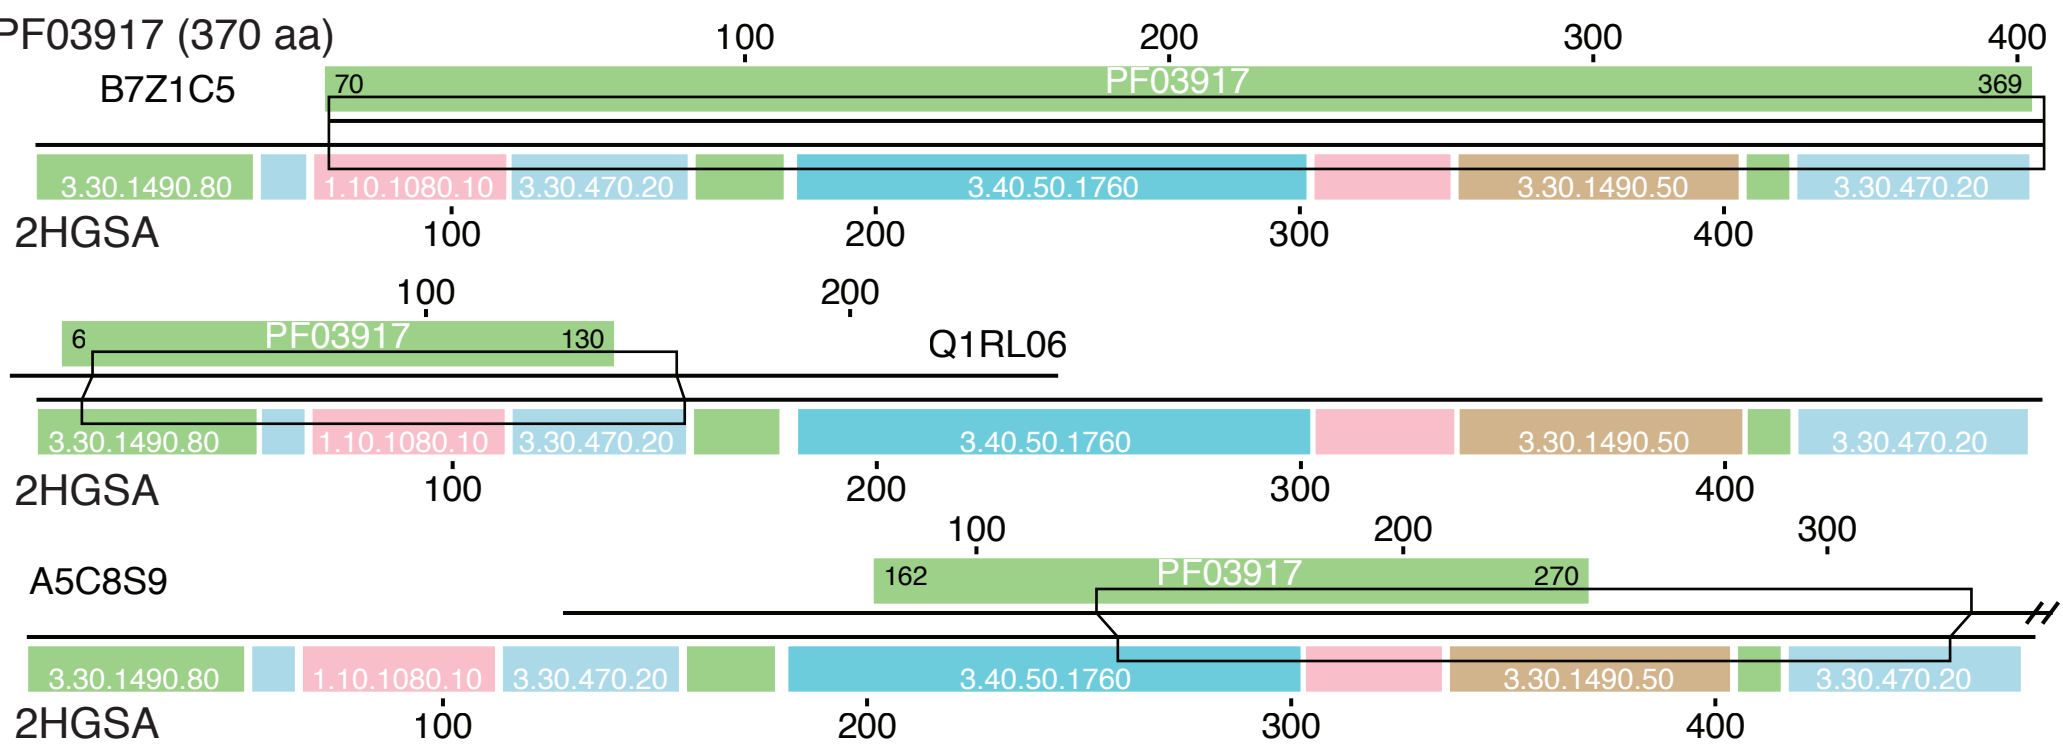

Supplement: 13059_2015_656_MOESM3_ESM.pdf [file 13059_2015_656_MOESM3_ESM.pdf]
