# Supplementary material for: Most partial domains in proteins are alignment and annotation artifacts
Source: PubMed Central journal article supplement (PMC4443539; doi:10.1186/s13059-015-0656-7), 2015-05-15

**PF00183 (531 aa)**

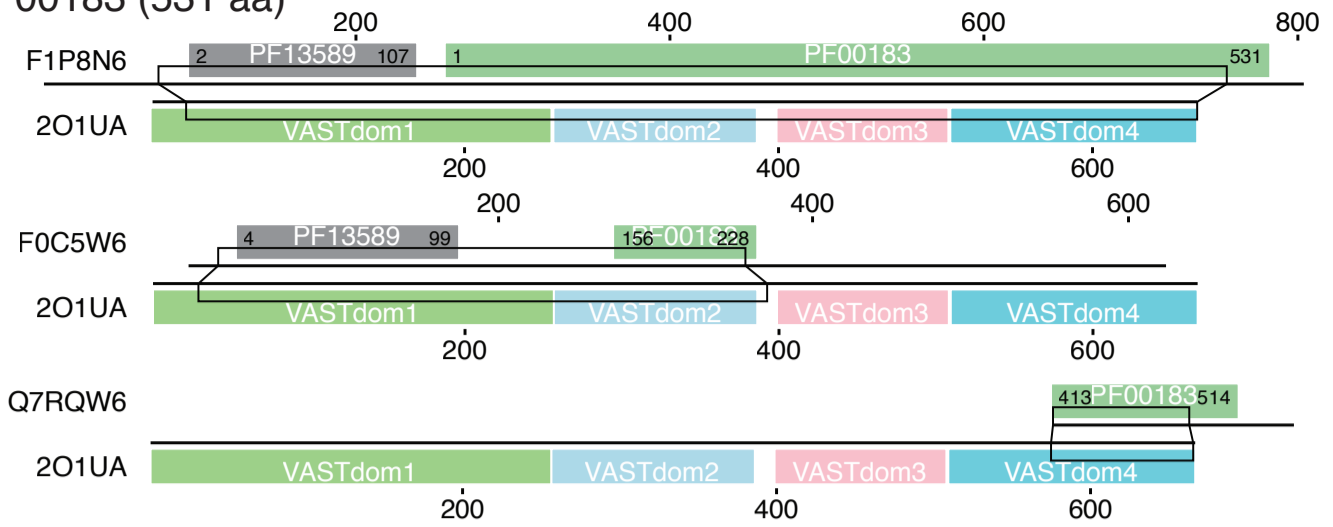

**PF00852 (352 aa)**

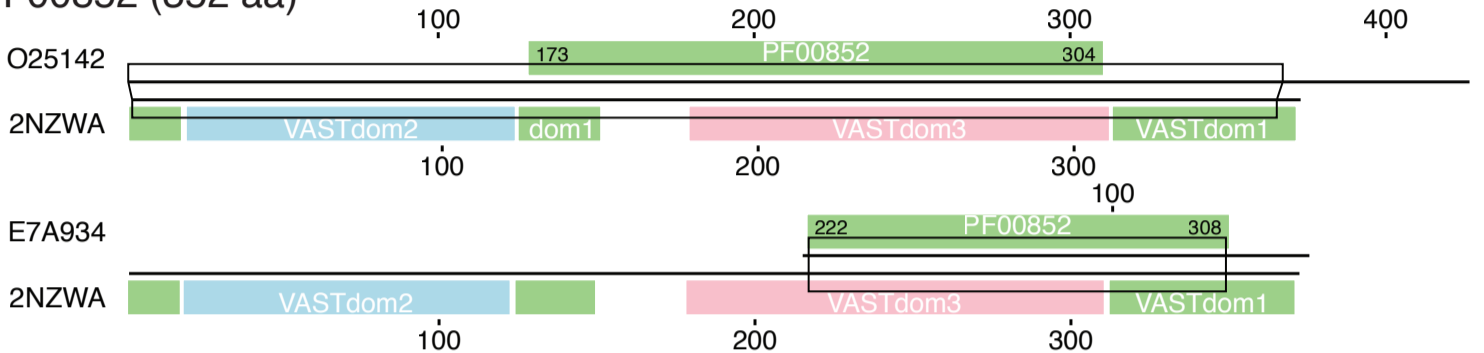

**PF01142 (378 aa)**

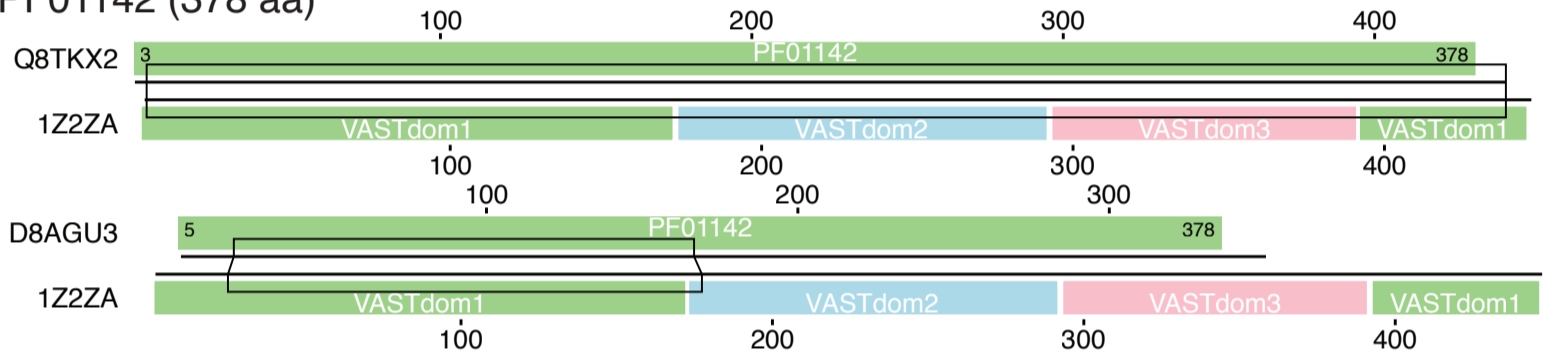

**PF03055 (486 aa)**

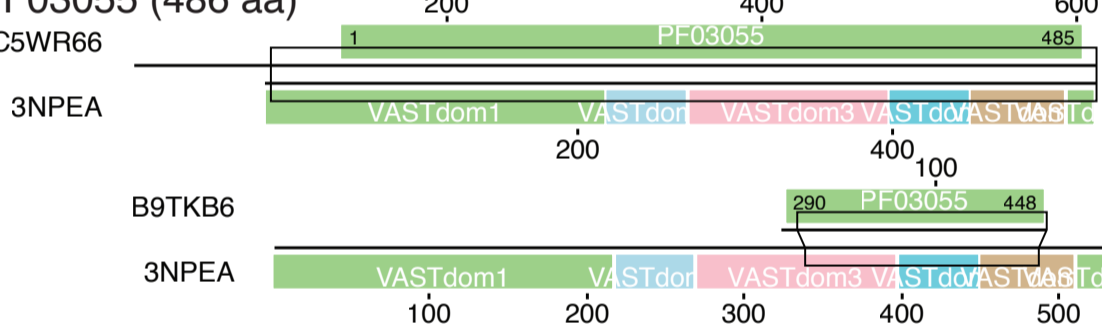

**PF03747 (289 aa)**

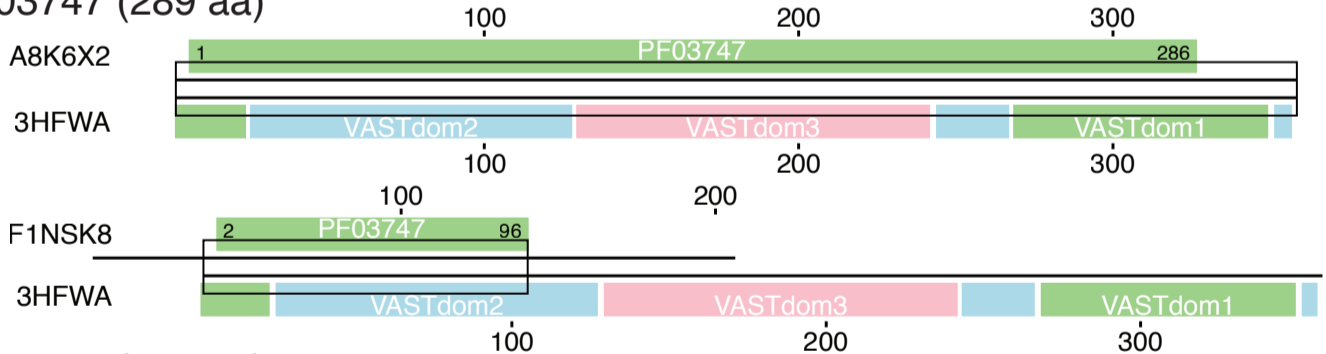

**PF04734 (675 aa)**

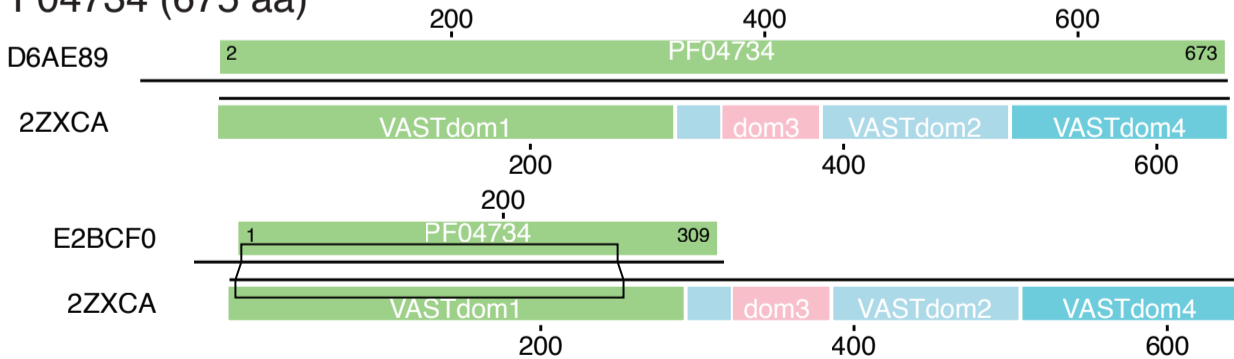

**PF11838 (324 aa)**

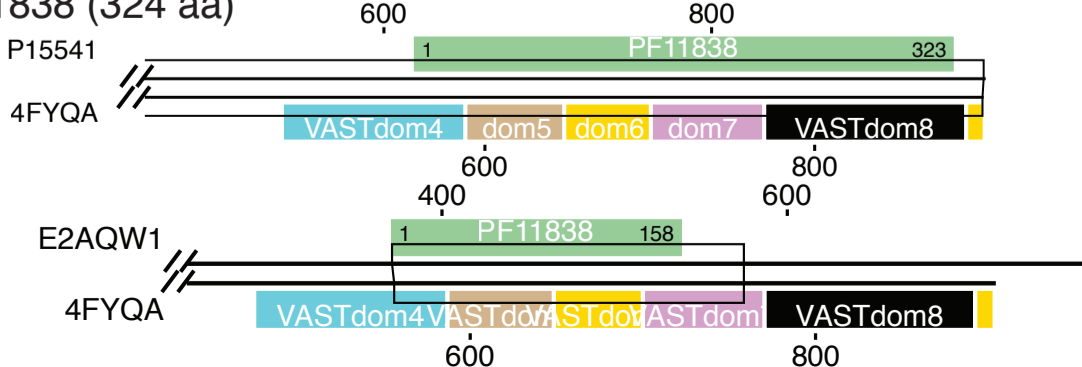

Supplement: 13059_2015_656_MOESM4_ESM.pdf [file 13059_2015_656_MOESM4_ESM.pdf]
